# Supplementary material for: Recurrent Loss of Macrodomain Activity in Host Immunity and Viral Proteins
Source: Pathogens. 2023 May 3;12(5):674. doi: 10.3390/pathogens12050674 (PMC10221186; doi:10.3390/pathogens12050674)
Supplement: Supplementary file 1 [file pathogens-12-00674-s001.zip]

Archive with 10 entries (10 files):
- Supplemental-File-S4-Tested-proteins.xlsx
- __MACOSX/._Supplemental-File-S4-Tested-proteins.xlsx
- Supplemental figures S1 and S2.pdf
- __MACOSX/._Supplemental figures S1 and S2.pdf
- Supplemental-File-S1-MacroPARP-accessions.xlsx
- __MACOSX/._Supplemental-File-S1-MacroPARP-accessions.xlsx
- Supplemental-File-S2-CoV-accessions.xlsx
- __MACOSX/._Supplemental-File-S2-CoV-accessions.xlsx
- Supplemental-File-S3-Alphavirus-accessions.xlsx
- __MACOSX/._Supplemental-File-S3-Alphavirus-accessions.xlsx
