# Supplementary material for: Recurrent Loss of Macrodomain Activity in Host Immunity and Viral Proteins
Source: Pathogens. 2023 May 3;12(5):674. doi: 10.3390/pathogens12050674 (PMC10221186; doi:10.3390/pathogens12050674)
Supplement: Supplementary file 1 [file pathogens-12-00674-s001.zip › Supplemental-File-S1-MacroPARP-accessions.xlsx]

## Sheet: Sheet1
Accession #	Species
NP_001084884.1	Xenopus laevis
NP_001107919.2	Danio rerio
NP_001120163.1	Xenopus tropicalis
NP_001139574.1	Homo sapiens
NP_001193467.1	Bos taurus
NP_001392227.1	Mus musculus
NP_060024.2	Homo sapiens
XP_001500274.2	Equus caballus
XP_002942644.2	Xenopus tropicalis
XP_003388008.1	Amphimedon queenslandica
XP_003941705.2	Saimiri boliviensis boliviensis
XP_004036227.1	Gorilla gorilla gorilla
XP_004467211.1	Dasypus novemcinctus
XP_004577903.1	Ochotona princeps
XP_004606731.1	Sorex araneus
XP_004675217.1	Condylura cristata
XP_005017619.4	Anas platyrhynchos
XP_005049680.1	Ficedula albicollis
XP_005049681.1	Ficedula albicollis
XP_005049683.1	Ficedula albicollis
XP_005201452.1	Bos taurus
XP_005386576.1	Chinchilla lanigera
XP_005416076.1	Geospiza fortis
XP_005487996.1	Zonotrichia albicollis
XP_005505153.1	Columba livia
XP_005520018.1	Pseudopodoces humilis
XP_005548040.3	Macaca fascicularis
XP_005601990.1	Equus caballus
XP_005670224.3	Sus scrofa
XP_005813056.1	Xiphophorus maculatus
XP_005944169.1	Haplochromis burtoni
XP_006107721.1	Myotis lucifugus
XP_006137713.1	Pelodiscus sinensis
XP_006522455.1	Mus musculus
XP_006522457.2	Mus musculus
XP_006793753.1	Neolamprologus brichardi
XP_006805588.2	Neolamprologus brichardi
XP_006869486.1	Chrysochloris asiatica
XP_006884365.1	Elephantulus edwardii
XP_006905628.1	Pteropus alecto
XP_007116754.2	Physeter catodon
XP_007449765.1	Lipotes vexillifer
XP_007493852.1	Monodelphis domestica
XP_007552357.1	Poecilia formosa
XP_008050989.1	Carlito syrichta
XP_008107526.1	Anolis carolinensis
XP_008107544.2	Anolis carolinensis
XP_008265060.1	Oryctolagus cuniculus
XP_008278565.1	Stegastes partitus
XP_008284627.1	Stegastes partitus
XP_008301841.1	Stegastes partitus
XP_008318302.1	Cynoglossus semilaevis
XP_008583380.1	Galeopterus variegatus
XP_008706385.2	Ursus maritimus
XP_008942874.1	Merops nubicus
XP_008948744.1	Pan paniscus
XP_009086067.4	Serinus canaria
XP_009086069.2	Serinus canaria
XP_009198373.2	Papio anubis
XP_009289261.1	Aptenodytes forsteri
XP_009289264.1	Aptenodytes forsteri
XP_009325396.1	Pygoscelis adeliae
XP_009470176.1	Nipponia nippon
XP_009471885.1	Nipponia nippon
XP_009513377.1	Phalacrocorax carbo
XP_009569831.1	Cuculus canorus
XP_009576321.1	Fulmarus glacialis
XP_009578832.1	Fulmarus glacialis
XP_009639148.1	Egretta garzetta
XP_009675517.1	Struthio camelus australis
XP_009675518.1	Struthio camelus australis
XP_009696676.1	Cariama cristata
XP_009869054.1	Apaloderma vittatum
XP_009885562.1	Charadrius vociferus
XP_009885608.1	Charadrius vociferus
XP_009902704.1	Dryobates pubescens
XP_009902723.1	Dryobates pubescens
XP_009942534.1	Opisthocomus hoazin
XP_009947420.1	Leptosomus discolor
XP_009952026.1	Leptosomus discolor
XP_009994511.1	Chaetura pelagica
XP_010020189.1	Nestor notabilis
XP_010071492.1	Pterocles gutturalis
XP_010113772.1	Chlamydotis macqueenii
XP_010131144.1	Buceros rhinoceros silvestris
XP_010156833.1	Eurypyga helias
XP_010163290.1	Antrostomus carolinensis
XP_010183675.1	Mesitornis unicolor
XP_010195887.1	Colius striatus
XP_010199935.1	Colius striatus
XP_010202651.1	Colius striatus
XP_010225807.1	Tinamus guttatus
XP_010292485.1	Phaethon lepturus
XP_010302957.1	Balearica regulorum gibbericeps
XP_010368840.2	Rhinopithecus roxellana
XP_010573410.1	Haliaeetus leucocephalus
XP_010616285.1	Fukomys damarensis
XP_010737763.3	Larimichthys crocea
XP_010737913.3	Larimichthys crocea
XP_010872251.2	Esox lucius
XP_010892961.2	Esox lucius
XP_011368386.1	Pteropus vampyrus
XP_011485888.1	Oryzias latipes
XP_011510777.1	Homo sapiens
XP_011610197.2	Takifugu rubripes
XP_011720411.1	Macaca nemestrina
XP_011826951.1	Mandrillus leucophaeus
XP_011951065.2	Ovis aries
XP_012331635.1	Aotus nancymaae
XP_012495034.1	Propithecus coquereli
XP_012497462.1	Propithecus coquereli
XP_012588613.1	Condylura cristata
XP_012635941.2	Microcebus murinus
XP_012663884.1	Otolemur garnettii
XP_012692687.2	Clupea harengus
XP_012787751.1	Sorex araneus
XP_012874783.1	Dipodomys ordii
XP_012924267.1	Heterocephalus glaber
XP_013132723.1	Oreochromis niloticus
XP_013207845.1	Microtus ochrogaster
XP_013370548.1	Chinchilla lanigera
XP_013401659.1	Lingula anatina
XP_013403401.1	Lingula anatina
XP_013416238.2	Lingula anatina
XP_013815115.1	Apteryx mantelli mantelli
XP_013818716.2	Capra hircus
XP_013883779.1	Austrofundulus limnaeus
XP_014011665.1	Salmo salar
XP_014028957.1	Salmo salar
XP_014034922.2	Salmo salar
XP_014047716.2	Salmo salar
XP_014313248.1	Myotis lucifugus
XP_014402487.1	Myotis brandtii
XP_014448686.1	Tupaia chinensis
XP_014454792.1	Alligator mississippiensis
XP_014794912.1	Calidris pugnax
XP_014795154.1	Calidris pugnax
XP_014824387.1	Poecilia mexicana
XP_014851562.1	Poecilia mexicana
XP_014875619.1	Poecilia latipinna
XP_014877743.1	Poecilia latipinna
XP_014886317.1	Poecilia latipinna
XP_014909459.1	Poecilia latipinna
XP_015213968.1	Lepisosteus oculatus
XP_015226901.1	Cyprinodon variegatus
XP_015226912.1	Cyprinodon variegatus
XP_015257731.1	Cyprinodon variegatus
XP_015413969.1	Myotis davidii
XP_015490163.1	Parus major
XP_015724137.1	Coturnix japonica
XP_015820992.1	Nothobranchius furzeri
XP_015992513.2	Rousettus aegyptiacus
XP_016048063.1	Erinaceus europaeus
XP_016048066.1	Erinaceus europaeus
XP_016055600.1	Miniopterus natalensis
XP_016055643.1	Miniopterus natalensis
XP_016089353.1	Sinocyclocheilus grahami
XP_016340042.1	Sinocyclocheilus anshuiensis
XP_016353774.1	Sinocyclocheilus anshuiensis
XP_016389907.1	Sinocyclocheilus rhinocerous
XP_017213521.2	Danio rerio
XP_017276148.1	Kryptolebias marmoratus
XP_017296327.1	Kryptolebias marmoratus
XP_017325149.1	Ictalurus punctatus
XP_017325150.1	Ictalurus punctatus
XP_017325232.1	Ictalurus punctatus
XP_017363668.1	Cebus imitator
XP_017363677.1	Cebus imitator
XP_017537955.2	Pygocentrus nattereri
XP_017550531.2	Pygocentrus nattereri
XP_017550569.1	Pygocentrus nattereri
XP_017656057.1	Nannospalax galili
XP_017713683.1	Rhinopithecus bieti
XP_018091095.1	Xenopus laevis
XP_018091096.1	Xenopus laevis
XP_018092329.1	Xenopus laevis
XP_018094134.1	Xenopus laevis
XP_018094135.1	Xenopus laevis
XP_018094136.1	Xenopus laevis
XP_018537764.1	Lates calcarifer
XP_018879114.1	Gorilla gorilla gorilla
XP_019208919.1	Oreochromis niloticus
XP_019208943.1	Oreochromis niloticus
XP_019208948.1	Oreochromis niloticus
XP_019208954.1	Oreochromis niloticus
XP_019220939.1	Oreochromis niloticus
XP_019378090.1	Gavialis gangeticus
XP_019378094.1	Gavialis gangeticus
XP_019410032.1	Crocodylus porosus
XP_019569580.1	Rhinolophus sinicus
XP_019569607.1	Rhinolophus sinicus
XP_019569608.1	Rhinolophus sinicus
XP_019631658.1	Branchiostoma belcheri
XP_019646075.1	Branchiostoma belcheri
XP_019663496.1	Ailuropoda melanoleuca
XP_020038998.1	Castor canadensis
XP_020315976.1	Oncorhynchus kisutch
XP_020341691.2	Oncorhynchus kisutch
XP_020500425.1	Labrus bergylta
XP_020510188.1	Labrus bergylta
XP_020635229.1	Pogona vitticeps
XP_020635236.1	Pogona vitticeps
XP_020841601.1	Phascolarctos cinereus
XP_021040411.1	Mus caroli
XP_021065122.1	Mus pahari
XP_021254183.1	Numida meleagris
XP_021327928.1	Danio rerio
XP_021354328.1	Mizuhopecten yessoensis
XP_021378677.1	Mizuhopecten yessoensis
XP_021378678.1	Mizuhopecten yessoensis
XP_021381704.1	Lonchura striata domestica
XP_021404382.1	Lonchura striata domestica
XP_021490311.1	Meriones unguiculatus
XP_021548338.1	Neomonachus schauinslandi
XP_021548421.1	Neomonachus schauinslandi
XP_022096544.1	Acanthaster planci
XP_022335825.1	Crassostrea virginica
XP_022336780.1	Crassostrea virginica
XP_022339594.1	Crassostrea virginica
XP_022370810.1	Enhydra lutris kenyoni
XP_022534288.2	Astyanax mexicanus
XP_022596696.1	Seriola dumerili
XP_022621617.1	Seriola dumerili
XP_022807465.1	Stylophora pistillata
XP_022795889.1	Stylophora pistillata
XP_023070473.2	Piliocolobus tephrosceles
XP_023144846.1	Amphiprion ocellaris
XP_023192011.1	Xiphophorus maculatus
XP_023192012.1	Xiphophorus maculatus
XP_023278826.1	Seriola lalandi dorsalis
XP_023557992.1	Octodon degus
XP_023678134.1	Paramormyrops kingsleyae
XP_023814608.1	Oryzias latipes
XP_023814611.1	Oryzias latipes
XP_023848995.1	Salvelinus alpinus
XP_024048276.1	Terrapene carolina triunguis
XP_024071616.2	Terrapene carolina triunguis
XP_024120280.1	Oryzias melastigma
XP_024144303.2	Oryzias melastigma
XP_024245498.1	Oncorhynchus tshawytscha
XP_024253437.2	Oncorhynchus tshawytscha
XP_024433831.1	Desmodus rotundus
XP_024433837.1	Desmodus rotundus
XP_024625058.1	Neophocaena asiaeorientalis asiaeorientalis
XP_025034569.1	Pelodiscus sinensis
XP_025094638.1	Pomacea canaliculata
XP_025094885.1	Pomacea canaliculata
XP_025094889.1	Pomacea canaliculata
XP_025140918.3	Bubalus bubalis
XP_025331098.3	Canis lupus dingo
XP_025731067.1	Callorhinus ursinus
XP_025761287.1	Oreochromis niloticus
XP_025769324.1	Puma concolor
XP_025904730.1	Nothoprocta perdicaria
XP_025932236.1	Apteryx rowi
XP_025943186.1	Apteryx rowi
XP_025999850.1	Astatotilapia calliptera
XP_026018062.1	Astatotilapia calliptera
XP_026075336.1	Carassius auratus
XP_026117839.1	Carassius auratus
XP_026127707.1	Carassius auratus
XP_026127711.1	Carassius auratus
XP_026129256.1	Carassius auratus
XP_026129262.1	Carassius auratus
XP_026150830.1	Mastacembelus armatus
XP_026151983.1	Mastacembelus armatus
XP_026178054.1	Mastacembelus armatus
XP_026232456.1	Anabas testudineus
XP_026232460.1	Anabas testudineus
XP_026521206.1	Notechis scutatus
XP_026521207.1	Notechis scutatus
XP_026521210.1	Notechis scutatus
XP_026707998.1	Athene cunicularia
XP_026708040.1	Athene cunicularia
XP_026783862.2	Pangasianodon hypophthalmus
XP_026789921.2	Pangasianodon hypophthalmus
XP_027014161.2	Tachysurus fulvidraco
XP_027035798.1	Pocillopora damicornis
XP_027035878.1	Pocillopora damicornis
XP_027035887.1	Pocillopora damicornis
XP_027136193.1	Larimichthys crocea
XP_027439742.2	Zalophus californianus
XP_027492932.1	Corapipo altera
XP_027534841.1	Neopelma chrysocephalum
XP_027630021.1	Tupaia chinensis
XP_027633180.1	Falco peregrinus
XP_027700971.1	Vombatus ursinus
XP_027701011.1	Vombatus ursinus
XP_027750895.1	Empidonax traillii
XP_027750902.1	Empidonax traillii
XP_027791745.1	Marmota flaviventris
XP_027879417.1	Xiphophorus couchianus
XP_027879420.1	Xiphophorus couchianus
XP_027966381.1	Eumetopias jubatus
XP_028009195.1	Eptesicus fuscus
XP_028268991.1	Parambassis ranga
XP_028289542.1	Parambassis ranga
XP_028292546.1	Gouania willdenowi
XP_028292550.1	Gouania willdenowi
XP_028330112.1	Gouania willdenowi
XP_028361030.1	Phyllostomus discolor
XP_028398972.1	Dendronephthya gigantea
XP_028608059.1	Grammomys surdaster
XP_028846982.1	Denticeps clupeoides
XP_028991722.1	Betta splendens
XP_028992075.1	Betta splendens
XP_029111890.1	Scleropages formosus
XP_029310994.1	Cottoperca gobio
XP_029314246.1	Cottoperca gobio
XP_029381986.1	Echeneis naucrates
XP_029385827.1	Echeneis naucrates
XP_029400588.1	Mus pahari
XP_029424107.1	Nannospalax galili
XP_029461152.1	Rhinatrema bivittatum
XP_029461153.1	Rhinatrema bivittatum
XP_029540687.1	Oncorhynchus nerka
XP_029620539.1	Salmo trutta
XP_029700675.1	Takifugu rubripes
XP_029795287.1	Suricata suricatta
XP_029795296.1	Suricata suricatta
XP_029875032.1	Aquila chrysaetos chrysaetos
XP_029915315.1	Myripristis murdjan
XP_029931738.1	Myripristis murdjan
XP_029936580.1	Myripristis murdjan
XP_029936582.1	Myripristis murdjan
XP_029937054.1	Myripristis murdjan
XP_029943861.1	Salarias fasciatus
XP_029943863.1	Salarias fasciatus
XP_029943871.1	Salarias fasciatus
XP_029967782.1	Salarias fasciatus
XP_029974868.1	Salarias fasciatus
XP_030018799.1	Sphaeramia orbicularis
XP_030198900.1	Gadus morhua
XP_030199139.1	Gadus morhua
XP_030199144.1	Gadus morhua
XP_030272164.1	Sparus aurata
XP_030272169.1	Sparus aurata
XP_030284310.1	Sparus aurata
XP_030286113.1	Sparus aurata
XP_030286301.1	Sparus aurata
XP_030287686.1	Sparus aurata
XP_030309919.1	Calypte anna
XP_030310266.1	Calypte anna
XP_030310376.1	Calypte anna
XP_030344135.1	Strigops habroptila
XP_030344147.1	Strigops habroptila
XP_030436581.1	Gopherus evgoodei
XP_030608899.1	Archocentrus centrarchus
XP_030609406.1	Archocentrus centrarchus
XP_030642428.1	Chanos chanos
XP_030808585.1	Camarhynchus parvulus
XP_030894926.1	Leptonychotes weddellii
XP_031145795.1	Sander lucioperca
XP_031147232.1	Sander lucioperca
XP_031147245.1	Sander lucioperca
XP_031160225.1	Sander lucioperca
XP_031164631.1	Sander lucioperca
XP_031219643.1	Mastomys coucha
XP_031219645.1	Mastomys coucha
XP_031433888.1	Clupea harengus
XP_031446537.1	Phasianus colchicus
XP_031575047.1	Actinia tenebrosa
XP_031600671.2	Oreochromis aureus
XP_031730887.1	Anarrhichthys ocellatus
XP_031748763.1	Xenopus tropicalis
XP_031749264.1	Xenopus tropicalis
XP_031969832.1	Corvus moneduloides
XP_032005906.1	Hylobates moloch
XP_032071638.1	Thamnophis elegans
XP_032190892.1	Mustela erminea
XP_032262566.1	Phoca vitulina
XP_032301847.1	Coturnix japonica
XP_032355071.1	Etheostoma spectabile
XP_032368829.1	Etheostoma spectabile
XP_032372443.1	Etheostoma spectabile
XP_032422922.1	Xiphophorus hellerii
XP_032433442.1	Xiphophorus hellerii
XP_032485302.1	Phocoena sinus
XP_032485771.1	Phocoena sinus
XP_032649886.1	Chelonoidis abingdonii
XP_032649890.1	Chelonoidis abingdonii
XP_032823277.1	Petromyzon marinus
XP_032859306.1	Tyto alba
XP_032920372.1	Catharus ustulatus
XP_032920375.1	Catharus ustulatus
XP_032920458.1	Catharus ustulatus
XP_032982507.1	Rhinolophus ferrumequinum
XP_032987586.1	Rhinolophus ferrumequinum
XP_032987630.1	Rhinolophus ferrumequinum
XP_032987823.1	Rhinolophus ferrumequinum
XP_033004042.1	Lacerta agilis
XP_033116466.1	Anneissia japonica
XP_033259249.2	Orcinus orca
XP_033473821.1	Epinephelus lanceolatus
XP_033475656.1	Epinephelus lanceolatus
XP_033757570.1	Pecten maximus
XP_033801127.1	Geotrypetes seraphini
XP_033842509.1	Periophthalmus magnuspinnatus
XP_033862086.2	Acipenser ruthenus
XP_033899511.2	Acipenser ruthenus
XP_033961658.1	Pseudochaenichthys georgianus
XP_033965387.1	Pseudochaenichthys georgianus
XP_033965388.1	Pseudochaenichthys georgianus
XP_033990542.1	Trematomus bernacchii
XP_034027241.1	Thalassophryne amazonica
XP_034055193.1	Gymnodraco acuticeps
XP_034086293.1	Gymnodraco acuticeps
XP_034086336.1	Gymnodraco acuticeps
XP_034279099.1	Pantherophis guttatus
XP_034279267.1	Pantherophis guttatus
XP_034317326.1	Crassostrea gigas
XP_034328114.1	Crassostrea gigas
XP_034328116.1	Crassostrea gigas
XP_034371291.1	Arvicanthis niloticus
XP_034396584.1	Cyclopterus lumpus
XP_034416748.1	Cyclopterus lumpus
XP_034416749.1	Cyclopterus lumpus
XP_034430841.1	Hippoglossus hippoglossus
XP_034515386.1	Ailuropoda melanoleuca
XP_034532883.1	Notolabrus celidotus
XP_034548742.1	Notolabrus celidotus
XP_034548949.1	Notolabrus celidotus
XP_034549319.1	Notolabrus celidotus
XP_034640974.1	Trachemys scripta elegans
XP_034712922.1	Etheostoma cragini
XP_034727630.1	Etheostoma cragini
XP_034742022.1	Etheostoma cragini
XP_034742029.1	Etheostoma cragini
XP_034855916.1	Mirounga leonina
XP_035004861.2	Hippoglossus stenolepis
XP_035129919.1	Callithrix jacchus
XP_035265189.1	Anguilla anguilla
XP_035412044.1	Cygnus atratus
XP_035460344.2	Scophthalmus maximus
XP_035460346.2	Scophthalmus maximus
XP_035532032.1	Morone saxatilis
XP_035609294.2	Oncorhynchus keta
XP_035651013.1	Oncorhynchus keta
XP_035673943.1	Branchiostoma floridae
XP_035674109.1	Branchiostoma floridae
XP_035806273.1	Amphiprion ocellaris
XP_035874076.1	Phyllostomus discolor
XP_035874077.1	Phyllostomus discolor
XP_035874078.1	Phyllostomus discolor
XP_035949614.1	Halichoerus grypus
XP_035995516.1	Fundulus heteroclitus
XP_036001917.1	Fundulus heteroclitus
XP_036059922.1	Onychomys torridus
XP_036074719.1	Rousettus aegyptiacus
XP_036075686.1	Rousettus aegyptiacus
XP_036098840.1	Molossus molossus
XP_036204219.1	Myotis myotis
XP_036207160.1	Myotis myotis
XP_036242430.1	Molothrus ater
XP_036242950.1	Molothrus ater
XP_036299718.1	Pipistrellus kuhlii
XP_036356136.1	Octopus sinensis
XP_036396640.1	Megalops cyprinoides
XP_036401797.1	Megalops cyprinoides
XP_036417757.1	Colossoma macropomum
XP_036417765.1	Colossoma macropomum
XP_036426942.1	Colossoma macropomum
XP_036450534.1	Colossoma macropomum
XP_036600566.1	Trichosurus vulpecula
XP_036601138.1	Trichosurus vulpecula
XP_036602616.1	Trichosurus vulpecula
XP_036603617.1	Trichosurus vulpecula
XP_036739406.1	Manis pentadactyla
XP_036843269.1	Oncorhynchus mykiss
XP_036907370.1	Sturnira hondurensis
XP_036907373.1	Sturnira hondurensis
XP_036907376.1	Sturnira hondurensis
XP_036953428.1	Acanthopagrus latus
XP_036967979.1	Acanthopagrus latus
XP_036968284.1	Acanthopagrus latus
XP_036988265.1	Artibeus jamaicensis
XP_037254023.1	Falco rusticolus
XP_037343813.1	Pungitius pungitius
XP_037381341.1	Talpa occidentalis
XP_037381344.1	Talpa occidentalis
XP_037587159.1	Cebus imitator
XP_037645018.1	Sebastes umbrosus
XP_037768692.1	Chelonia mydas
XP_037768693.1	Chelonia mydas
XP_037832644.1	Kryptolebias marmoratus
XP_037999232.1	Motacilla alba alba
XP_038071268.1	Patiria miniata
XP_038126370.1	Cyprinodon tularosa
XP_038138807.1	Cyprinodon tularosa
XP_038139243.1	Cyprinodon tularosa
XP_038202197.1	Arvicola amphibius
XP_038277357.1	Dermochelys coriacea
XP_038277768.1	Dermochelys coriacea
XP_038301074.1	Canis lupus familiaris
XP_038559136.1	Micropterus salmoides
XP_038559138.1	Micropterus salmoides
XP_038559139.1	Micropterus salmoides
XP_038576030.1	Micropterus salmoides
XP_038587305.1	Micropterus salmoides
XP_038645725.1	Scyliorhinus canicula
XP_038654292.1	Scyliorhinus canicula
XP_039096578.1	Hyaena hyaena
XP_039096583.1	Hyaena hyaena
XP_039179733.1	Crotalus tigris
XP_039179751.1	Crotalus tigris
XP_039258409.1	Styela clava
XP_039351195.1	Mauremys reevesii
XP_039351391.1	Mauremys reevesii
XP_039411530.1	Corvus cornix cornix
XP_039465722.1	Oreochromis aureus
XP_039511469.1	Pimephales promelas
XP_039553709.1	Passer montanus
XP_039553993.1	Passer montanus
XP_039586104.1	Passer montanus
XP_039613228.1	Polypterus senegalus
XP_039613230.1	Polypterus senegalus
XP_039613265.1	Polypterus senegalus
XP_039673636.1	Perca fluviatilis
XP_039673639.1	Perca fluviatilis
XP_039869371.1	Simochromis diagramma
XP_039883585.1	Simochromis diagramma
XP_039883598.1	Simochromis diagramma
XP_039900939.1	Simochromis diagramma
XP_039925563.1	Hirundo rustica
XP_039925623.1	Hirundo rustica
XP_040036850.1	Gasterosteus aculeatus aculeatus
XP_040056587.1	Gasterosteus aculeatus aculeatus
XP_040056592.1	Gasterosteus aculeatus aculeatus
XP_040214241.1	Rana temporaria
XP_040214268.1	Rana temporaria
XP_040214269.1	Rana temporaria
XP_040214270.1	Rana temporaria
XP_040297035.1	Bufo bufo
XP_040417099.1	Cygnus olor
XP_040418259.1	Cygnus olor
XP_040459958.1	Falco naumanni
XP_040477260.1	Ursus maritimus
XP_040531610.1	Gallus gallus
XP_040606787.1	Mesocricetus auratus
XP_040858592.1	Ochotona curzoniae
XP_040858902.1	Ochotona curzoniae
XP_040887490.1	Toxotes jaculatrix
XP_040897570.1	Toxotes jaculatrix
XP_041040001.1	Carcharodon carcharias
XP_041057608.1	Carcharodon carcharias
XP_041117282.1	Polyodon spathula
XP_041118944.1	Polyodon spathula
XP_041119389.1	Polyodon spathula
XP_041119395.1	Polyodon spathula
XP_041120245.1	Polyodon spathula
XP_041329046.1	Pyrgilauda ruficollis
XP_041528830.1	Microtus oregoni
XP_041529179.1	Microtus oregoni
XP_041635840.1	Cheilinus undulatus
XP_041643514.1	Cheilinus undulatus
XP_041663634.1	Cheilinus undulatus
XP_041663639.1	Cheilinus undulatus
XP_041724440.2	Coregonus clupeaformis
XP_041726076.2	Coregonus clupeaformis
XP_041792512.1	Chelmon rostratus
XP_041820782.1	Chelmon rostratus
XP_041840896.1	Melanotaenia boesemani
XP_041855415.1	Melanotaenia boesemani
XP_041922493.1	Alosa sapidissima
XP_041928980.1	Alosa sapidissima
XP_041947799.1	Alosa sapidissima
XP_042070746.1	Haplochromis burtoni
XP_042071510.1	Haplochromis burtoni
XP_042115192.1	Peromyscus maniculatus bairdii
XP_042166903.1	Oncorhynchus tshawytscha
XP_042192198.1	Callorhinchus milii
XP_042192367.1	Callorhinchus milii
XP_042276246.1	Thunnus maccoyii
XP_042281856.1	Thunnus maccoyii
XP_042351029.1	Plectropomus leopardus
XP_042351030.1	Plectropomus leopardus
XP_042367809.1	Plectropomus leopardus
XP_042523407.1	Dipodomys spectabilis
XP_042523583.1	Dipodomys spectabilis
XP_042587927.1	Cyprinus carpio
XP_042588394.1	Cyprinus carpio
XP_042610333.1	Cyprinus carpio
XP_042611133.1	Cyprinus carpio
XP_042619565.1	Cyprinus carpio
XP_042620904.1	Cyprinus carpio
XP_042639664.1	Tyto alba
XP_042640334.1	Tyto alba
XP_042733972.1	Lagopus leucura
XP_043104773.1	Puntigrus tetrazona
XP_043104775.1	Puntigrus tetrazona
XP_043106137.1	Puntigrus tetrazona
XP_043360906.1	Dermochelys coriacea
XP_043360910.1	Dermochelys coriacea
XP_043380894.1	Chelonia mydas
XP_043450255.1	Prionailurus bengalensis
XP_043546628.1	Chiloscyllium plagiosum
XP_043549913.1	Chiloscyllium plagiosum
XP_043550085.1	Chiloscyllium plagiosum
XP_043550088.1	Chiloscyllium plagiosum
XP_043729757.1	Cervus elaphus
XP_043729760.1	Cervus elaphus
XP_043846891.1	Dromiciops gliroides
XP_043852360.1	Dromiciops gliroides
XP_043929617.1	Protopterus annectens
XP_043988457.1	Gambusia affinis
XP_044040522.1	Siniperca chuatsi
XP_044053379.1	Siniperca chuatsi
XP_044053383.1	Siniperca chuatsi
XP_044108154.1	Neogale vison
XP_044130438.1	Bufo gargarizans
XP_044175126.1	Acropora millepora
XP_044197446.1	Thunnus albacares
XP_044294376.1	Varanus komodoensis
XP_044294417.1	Varanus komodoensis
XP_044525985.1	Gracilinanus agilis
XP_044525986.1	Gracilinanus agilis
XP_044627422.1	Equus asinus
XP_044627424.1	Equus asinus
XP_044888290.1	Mauremys mutica
XP_044944760.1	Mustela putorius furo
XP_044944769.1	Mustela putorius furo
XP_045004395.1	Jaculus jaculus
XP_045062345.1	Coregonus clupeaformis
XP_045066566.1	Coregonus clupeaformis
XP_045143450.1	Echinops telfairi
XP_045160864.1	Mercenaria mercenaria
XP_045358221.1	Leopardus geoffroyi
XP_045363298.1	Camelus bactrianus
XP_045396103.1	Lemur catta
XP_045560784.1	Salmo salar
XP_045707039.1	Phyllostomus hastatus
XP_045858305.1	Meles meles
XP_045858583.1	Meles meles
XP_045919896.1	Micropterus dolomieu
XP_046173007.1	Oncorhynchus gorbuscha
XP_046237200.1	Scatophagus argus
XP_046242507.1	Scatophagus argus
XP_046555942.1	Haliotis rubra
XP_046562802.1	Haliotis rubra
XP_046896609.1	Hypomesus transpacificus
XP_046901993.1	Hypomesus transpacificus
XP_046902162.1	Hypomesus transpacificus
XP_046902165.1	Hypomesus transpacificus
XP_047198586.1	Hippoglossus stenolepis
XP_047241013.1	Girardinichthys multiradiatus
XP_047420875.1	Sciurus carolinensis
XP_047421440.1	Sciurus carolinensis
XP_047456372.1	Mugil cephalus
XP_047456374.1	Mugil cephalus
XP_047591238.1	Lutra lutra
XP_047591243.1	Lutra lutra
XP_047646752.1	Phacochoerus africanus
XP_047670849.1	Tachysurus fulvidraco
XP_047670851.1	Tachysurus fulvidraco
XP_048050021.1	Megalobrama amblycephala
XP_048050714.1	Megalobrama amblycephala
XP_048050723.1	Megalobrama amblycephala
XP_048092469.1	Alosa alosa
XP_048095645.1	Alosa alosa
XP_048164927.1	Corvus hawaiiensis
XP_048164934.1	Corvus hawaiiensis
XP_048202716.1	Perognathus longimembris pacificus
XP_048202719.1	Perognathus longimembris pacificus
XP_048202720.1	Perognathus longimembris pacificus
XP_048244596.1	Haliotis rufescens
XP_048244610.1	Haliotis rufescens
XP_048310117.1	Myodes glareolus
XP_048310122.1	Myodes glareolus
XP_048390243.1	Stegostoma fasciatum
XP_048390257.1	Stegostoma fasciatum
XP_048455185.1	Rhincodon typus
XP_048744912.1	Ostrea edulis
XP_048747092.1	Ostrea edulis
XP_048747093.1	Ostrea edulis
XP_048808693.1	Lagopus muta
XP_048826811.1	Brienomyrus brachyistius
XP_049340822.1	Astyanax mexicanus
XP_049340930.1	Astyanax mexicanus
XP_049423908.1	Epinephelus fuscoguttatus
XP_049449352.1	Epinephelus fuscoguttatus
XP_049449353.1	Epinephelus fuscoguttatus
XP_049670391.1	Accipiter gentilis
XP_049733945.1	Elephas maximus indicus
XP_049924045.1	Epinephelus moara
XP_050395686.1	Patella vulgata
XP_050755460.1	Gymnogyps californianus
XP_050755660.1	Gymnogyps californianus
XP_050755705.1	Gymnogyps californianus
XP_050925998.1	Lates calcarifer
XP_050971713.1	Labeo rohita
XP_050971715.1	Labeo rohita
XP_051005825.1	Acomys russatus
XP_051005826.1	Acomys russatus
XP_051258310.1	Dicentrarchus labrax
XP_051278210.1	Dicentrarchus labrax
XP_051284632.1	Dicentrarchus labrax
XP_051478710.1	Apus apus
XP_051478976.1	Apus apus
XP_051564334.1	Myxocyprinus asiaticus
XP_051564336.1	Myxocyprinus asiaticus
XP_051761257.1	Ctenopharyngodon idella
XP_051762270.1	Ctenopharyngodon idella
XP_051767269.1	Ctenopharyngodon idella
XP_051767275.1	Ctenopharyngodon idella
XP_051786506.1	Erpetoichthys calabaricus
XP_051786508.1	Erpetoichthys calabaricus
XP_051800003.1	Acanthochromis polyacanthus
XP_051806530.1	Acanthochromis polyacanthus
XP_051815034.1	Acanthochromis polyacanthus
XP_051841363.1	Antechinus flavipes
XP_051841366.1	Antechinus flavipes
XP_051874680.1	Pristis pectinata
XP_051972415.1	Xyrauchen texanus
XP_051973986.1	Xyrauchen texanus
XP_051991394.1	Xyrauchen texanus
XP_052004309.1	Xyrauchen texanus
XP_052014171.1	Apodemus sylvaticus
XP_052014172.1	Apodemus sylvaticus
XP_052088524.1	Mytilus californianus
XP_052088526.1	Mytilus californianus
XP_052088534.1	Mytilus californianus
XP_052088537.1	Mytilus californianus
XP_052102649.1	Mytilus californianus
XP_052225253.1	Dreissena polymorpha
XP_052225515.1	Dreissena polymorpha
XP_052226410.1	Dreissena polymorpha
XP_052261006.1	Dreissena polymorpha
XP_052266746.1	Dreissena polymorpha
XP_052377031.1	Oncorhynchus keta
XP_052423124.1	Carassius gibelio
XP_052502249.1	Budorcas taxicolor
XP_052530569.1	Tympanuchus pallidicinctus
XP_052647804.1	Harpia harpyja
XP_052648064.1	Harpia harpyja
XP_052703238.1	Crassostrea angulata
XP_052705568.1	Crassostrea angulata
XP_052761049.1	Mya arenaria
XP_052771711.1	Mya arenaria
XP_052771861.1	Mya arenaria
XP_850880.3	Canis lupus familiaris
XP_020925482.1	Sus scrofa
