# Supplementary material for: Recurrent Loss of Macrodomain Activity in Host Immunity and Viral Proteins
Source: Pathogens. 2023 May 3;12(5):674. doi: 10.3390/pathogens12050674 (PMC10221186; doi:10.3390/pathogens12050674)
Supplement: Supplementary file 1 [file pathogens-12-00674-s001.zip › Supplemental-File-S2-CoV-accessions.xlsx]

## Sheet: Sheet1
Accession #	Species
YP_009755889.1	Alphacoronavirus Bat CoV/P.kuhlii/Italy/3398 19/2015
YP_009361855.1	Bat coronavirus
YP_009824988.1	Bat coronavirus
YP_001718603.1	Bat coronavirus 1A
YP_010229071.1	Bat coronavirus BM48 31/BGR/2008
YP_008439201.1	Bat coronavirus CDPHE15/USA/2006
YP_008439214.1	Bat coronavirus CDPHE15/USA/2006
YP_009915659.1	Bat Hp betacoronavirus/Zhejiang2013
YP_001876436.1	Beluga whale coronavirus SW1
YP_007188577.3	Betacoronavirus England 1
YP_009513009.1	Betacoronavirus Erinaceus/VMC/DEU/2012
YP_009944267.1	Betacoronavirus HKU24
NP_150074.1	Bovine coronavirus
YP_009199608.1	BtMr AlphaCoV/SAX2011
YP_009201729.1	BtNv AlphaCoV/SC2013
YP_009199789.1	BtRf AlphaCoV/HuB2013
YP_009200734.1	BtRf AlphaCoV/YN2012
YP_002308478.1	Bulbul coronavirus HKU11 934
YP_009194637.1	Camel alphacoronavirus
YP_009755896.1	Canada goose coronavirus
YP_009755912.1	Canada goose coronavirus
YP_010229074.1	Common moorhen coronavirus HKU21
YP_009380519.1	Coronavirus AcCoV JC34
YP_009825006.1	Duck coronavirus
YP_009825031.1	Duck coronavirus
YP_004070193.2	Feline infectious peritonitis virus
YP_009256195.1	Ferret coronavirus
NP_073550.1	Human coronavirus 229E
YP_173236.1	Human coronavirus HKU1
YP_003766.2	Human coronavirus NL63
YP_009555238.1	Human coronavirus OC43
NP_066134.1	Infectious bronchitis virus
YP_009824997.1	Infectious bronchitis virus
YP_009336483.1	Lucheng Rn rat coronavirus
YP_010229072.1	Magpie robin coronavirus HKU18
YP_009047202.1	Middle East respiratory syndrome related coronavirus
YP_001718610.1	Miniopterus bat coronavirus HKU8
YP_009019180.1	Mink coronavirus strain WD1127
YP_002308505.1	Munia coronavirus HKU13 3514
YP_009824979.1	Murine hepatitis virus
YP_009915675.1	Murine hepatitis virus
YP_209230.1	Murine hepatitis virus strain JHM
YP_005352862.1	Night heron coronavirus HKU19
YP_009328933.1	NL63 related bat coronavirus
YP_009824965.1	NL63 related bat coronavirus
YP_001039961.1	Pipistrellus bat coronavirus HKU5
YP_009513020.1	Porcine coronavirus HKU15
NP_839958.1	Porcine epidemic diarrhea virus
YP_005454239.1	Rabbit coronavirus HKU14
YP_003029845.1	Rat coronavirus Parker
YP_001552234.1	Rhinolophus bat coronavirus HKU2
YP_009944265.1	Rodent coronavirus
YP_009273004.1	Rousettus bat coronavirus
YP_006908641.2	Rousettus bat coronavirus HKU10
YP_001039970.1	Rousettus bat coronavirus HKU9
YP_009924385.1	Rousettus bat coronavirus HKU9
NP_828849.7	SARS coronavirus Tor2
YP_001351683.1	Scotophilus bat coronavirus 512
YP_009724389.1	Severe acute respiratory syndrome coronavirus 2
YP_009755838.1	Shrew coronavirus
YP_005352845.1	Sparrow coronavirus HKU17
YP_009199240.1	Swine enteric coronavirus
YP_002308496.1	Thrush coronavirus HKU12 600
NP_058423.1	Transmissible gastroenteritis virus
YP_001941165.1	Turkey coronavirus
YP_001941176.1	Turkey coronavirus
YP_001039952.1	Tylonycteris bat coronavirus HKU4
YP_009944312.1	Tylonycteris bat coronavirus HKU4
YP_009389424.1	Wencheng Sm shrew coronavirus
YP_009824973.1	Wencheng Sm shrew coronavirus
YP_005352837.1	White eye coronavirus HKU16
YP_005352870.1	Wigeon coronavirus HKU20
