# Supplementary material for: Recurrent Loss of Macrodomain Activity in Host Immunity and Viral Proteins
Source: Pathogens. 2023 May 3;12(5):674. doi: 10.3390/pathogens12050674 (PMC10221186; doi:10.3390/pathogens12050674)
Supplement: Supplementary file 1 [file pathogens-12-00674-s001.zip › Supplemental-File-S3-Alphavirus-accessions.xlsx]

## Sheet: Sheet1
Accession #	Species
NP_598184.1	Sleeping disease virus
NP_040822.1	Venezuelan equine encephalitis virus
NP_041254.1	Onyong nyong virus
NP_062879.1	Ross River virus
NP_062888.1	Sindbis virus
NP_463457.1	Semliki Forest virus
NP_579968.1	Mayaro virus
NP_597797.2	Barmah Forest virus
NP_632021.2	Eastern equine encephalitis virus
NP_632023.2	Aura virus
NP_640330.1	Western equine encephalitis virus
NP_647496.1	Salmon pancreas disease virus
NP_690588.1	Chikungunya virus
YP_002802299.1	Highlands J virus
YP_003324587.1	Fort Morgan virus
YP_008888544.1	Ndumu virus
YP_008888545.1	Southern elephant seal virus
YP_008888546.1	Whataroa virus
YP_008901140.1	Bebaru virus
YP_008901141.1	Eilat virus
YP_009020570.1	Madariaga virus
YP_009058892.1	Middelburg virus
YP_009333615.1	Tai Forest alphavirus
YP_009507794.1	Cabassou virus
YP_009507796.1	Everglades virus
YP_009507798.1	Mucambo virus
YP_009507800.1	Pixuna virus
YP_009507802.1	Rio Negro virus
YP_009507804.1	Tonate virus
YP_009508088.1	Mosso das Pedras virus
YP_009665988.1	Una virus
YP_010087634.1	Caaingua virus
YP_164438.1	Getah virus
