# Supplementary material for: Recurrent Loss of Macrodomain Activity in Host Immunity and Viral Proteins
Source: Pathogens. 2023 May 3;12(5):674. doi: 10.3390/pathogens12050674 (PMC10221186; doi:10.3390/pathogens12050674)
Supplement: Supplementary file 1 [file pathogens-12-00674-s001.zip › Supplemental-File-S4-Tested-proteins.xlsx]

## Sheet: Tested macrodomains
Macrodomain	Accession #	Active?	Protein sequence
Af1521	AAB89725.1	Yes	MERRTLIMEVLFEAKVGDITLKLAQGDITQYPAKAIVNAANKRLEHGGGVAYAIAKACAGDAGLYTEISKKAMREQFGRDYIDHGEVVVTPAMNLEERGIKYVFHTVGPICSGMWSEELKEKLYKAFLGPLEKAEEMGVESIAFPAVSAGIYGCDLEKVVETFLEAVKNFKGSAVKEVALVIYDRKSAEVALKVFERSL
Human-PARP14-macro1	NP_060024.2	Yes	KCFSRTVLAPGVVLIVQQGDLARLPVDVVVNASNEDLKHYGGLAAALSKAAGPELQADCDQIVKREGRLLPGNATISKAGKLPYHHVIHAVGPRWSGYEAPRCVYLLRRAVQLSLCLAEKYKYRSIAIPAISSGVFGFPLGRCVETIVSAIKENFQFKKDGHCLKEIYLVDVSEKTVEAFAEAVKTVF
Human-PARP14-macro2	NP_060024.2	No	WEKGSLVSPGGLQMLLVKEGVQNAKTDVVVNSVPLDLVLSRGPLSKSLLEKAGPELQEELDTVGQGVAVSMGTVLKTSSWNLDCRYVLHVVAPEWRNGSTSSLKIMEDIIRECMEITESLSLKSIAFPAIGTGNLGFPKNIFAELIISEVFKFSSKNQLKTLQEVHFLLHPSDHENIQAFSDEFARRA
Human-PARP14-macro3	NP_060024.2	No	DSGVYEMKIGSIIFQVASGDITKEEADVIVNSTSNSFNLKAGVSKAILECAGQNVERECSQQAQQRKNDYIITGGGFLRCKNIIHVIGGNDVKSSVSSVLQECEKKNYSSICLPAIGTGNAKQHPDKVAEAIIDAIEDFVQKGSAQSVKKVKVVIFLPQVLDVFYANMKKRE
Human-PARP15-macro1	XP_011510777.1	No (poorly expressed)	PSFNAMVVNNLTLQIVQGHIEWQTADVIVNSVNPHDITVGPVAKSILQQAGVEMKSEFLATKAKQFQRSQLVLVTKGFNLFCKYIYHVLWHSEFPKPQILKHAMKECLEKCIEQNITSISFPALGTGNMEIKKETAAEILFDEVLTFAKDHVKHQLTVKFVIFPTDLEIYKAFSSEMAKRS
Human-PARP15-macro2	XP_011510777.1	No	CFTAYEMKIGAITFQVATGDIATEQVDVIVNSTARTFNRKSGVSRAILEGAGQAVESECAVLAAQPHRDFIITPGGCLKCKIIIHVPGGKDVRKTVTSVLEECEQRKYTSVSLPAIGTGNAGKNPITVADNIIDAIVDFSSQHSTPSLKTVKVVIFQPELLNIFYDSMKKRD
Human-PARP9-macro1	NP_001139574.1	Yes	QVFRKMLTPRIELSVWKDDLTTHAVDAVVNAANEDLLHGGGLALALVKAGGFEIQEESKQFVARYGKVSAGEIAVTGAGRLPCKQIIHAVGPRWMEWDKQGCTGKLQRAIVSILNYVIYKNTHIKTVAIPALSSGIFQFPLNLCTKTIVETIRVSLQGKPMMSNLKEIHLVSNEDPTVAAFKAASEFIL
Human-PARP9-macro2	NP_001139574.1	No	PSFNAMVVNNLTLQIVQGHIEWQTADVIVNSVNPHDITVGPVAKSILQQAGVEMKSEFLATKAKQFQRSQLVLVTKGFNLFCKYIYHVLWHSEFPKPQILKHAMKECLEKCIEQNITSISFPALGTGNMEIKKETAAEILFDEVLTFAKDHVKHQLTVKFVIFPTDLEIYKAFSSEMAKRS
Stylophora-P14-macro1	XP_022807465.1	Yes	ESVCSFSTKGGKRISVMKGDITKERTDAIVNAANDELRHIGGLAAAIVRAGGEVIQDECNNYVAQNGRLLEGHVVVTGAGRLPCKQVIHAVGPKWDREADKKKRSGEETRQERYLKQAITNSLEEAKQQKSMSIPAVSSGVFGFPRDLCAKVILDAVLEFCDENPHSNLSEIHLINNDVQTVEAFHNEFKNRF
Mouse-PARP14-macro1	XP_006522455.1	Yes	KCHLQRDIAPGVKLFVLEEDLSRFPVDVVVNAANENLKHISGLAQALSKAAGPELQTECDQIVKEGGVVLPGNAVISKAGKLPCHHVIHAVGPRWKGDKVLECVSLLKKVVRQSLSLAEEHRCRSIAMPAVSAGIFDFPLELCVANIVSAIKEHFQHKRDTHTLKKIYLVGLPAKVARAFAEAVKTTY
Myotis-P14-macro1	XP_006107721.1	No	TCSCRTELAPGVSLIVQKGDLTRFPVEVVVNAANEDLRLSGGLAAALSKAAGPELQADCDRIVKKKGKIAIGHATISKAGKLPYHQVIHAVGPKWDSSDVLGCVSQLKNAVKKSLHLASKCQYQSIAIPAISSGDGGFPLSQCVETIVLAIKESFQYNWAGRTLKEVYLVDLAEKTVEAFAETVKTVF
Polar-bear-P14-macro1	XP_040477260.1	No	SSLSRVELAPGVSLTVQQGDLTRFPVEVVVSTATEDLKLCGSLAAALSKAAGPELQEDCDQIVKNRGKILPGSAIISKAGKLPYRHVIHAVGPRWKDDEVLMCLLQLKRAVEQSLRLAETHRCRSIAIPAICSGAGGFPLNQCVKMIVLAIKKNFQFKWDGQTLKEIYLVDTAEKAVQAFAETMKTVF
Cow-PARP14-macro1	NP_001193467.1	No	RCFFRTDLAPGVSLIVQQGDLTHFPVQVVVNAANEELKLRGALAAALLRAAGPELQEDCDQILKKRGKLSPPYAVISKAGKLPYQHVIHAVGPQWKSDEAQKCVLQLKNAVKESLNLAVKHKYQSIAIPAISSRTLSFPLSQCVEAIVLAIKEWFQCKKDGCTLKEIYLVDIAEKTVEAFAESAKSVF
SARS-CoV-2-macro1	YP_009724389.1	Yes	VNSFSGYLKLTDNVYIKNADIVEEAKKVKPTVVVNAANVYLKHGGGVAGALNKATNNAMQVESDDYIATNGPLKVGGSCVLSGHNLAKHCLHVVGPNVNKGEDIQLLKSAYENFNQHEVLLAPLLSAGIFGADPIHSLRVCVDTVRTNVYLAVFDKNLYDKLVSSFLEMKSEKQVEQKIAEI
SARS-CoV-2-macro2	YP_009724389.1	No	KIKACVEEVTTTLEETKFLTENLLLYIDINGNLHPDSATLVSDIDITFLKKDAPYIVGDVVQEGVLTAVVIPTKKAGGTTEMLAKALRKVPTDNYITTYPGQGLNGYTVEEAKTVLKKCKSAFYILPSIISNEKQEIL
SARS-CoV-2-macro3	YP_009724389.1	No	GTVSWNLREMLAHAEETRKLMPVCVETKAIVSTIQRKYKGIKIQEGVVDYGARFYFYTSKTTVASLINTLNDLNETLVTMPLGYVTHGLNLEEAARYMRSLKVPATVSVSSPDAVTAYNGYLTSSS
hCoV-229E	NP_073550.1	Yes	VKEKLNAFLVHDNVAFYQGDVDTVVNGVDFDFIVNAANENLAHGGGLAKALDVYTKGKLQRLSKEHIGLAGKVKVGTGVMVECDSLRIFNVVGPRKGKHERDLLIKAYNTINNEQGTPLTPILSCGIFGIKLETSLEVLLDVCNTKEVKVFVYTDTEVCKVKDFVSGLVNVQKVEQPKIEP
VEEV	NP_040822.1	Yes	APSYHVVRGDIATATEGVIINAANSKGQPGGGVCGALYKKFPESFDLQPIEVGKARLVKGAAKHIIHAVGPNFNKVSEVEGDKQLAEAYESIAKIVNDNNYKSVAIPLLSTGIFSGNKDRLTQSLNHLLTALDTTDADVAIYCRDKKWEMTLKEAVARRE
ChikV	NP_690588.1	Yes	APSYRVKRMDIAKNDEECVVNAANPRGLPGDGVCKAVYKKWPESFKNSATPVGTAKTVMCGTYPVIHAVGPNFSNYSESEGDRELAAAYREVAKEVTRLGVNSVAIPLLSTGVYSGGKDRLTQSLNHLFTAMDSTDADVVIYCRDKEWEKKISEAIQMRT
Sindbis virus	NP_062888.1	Yes	APSYRTKRENIADCQEEAVVNAANPLGRPGEGVCRAIYKRWPTSFTDSATETGTARMTVCLGKKVIHAVGPDFRKHPEAEALKLLQNAYHAVADLVNEHNIKSVAIPLLSTGIYAAGKDRLEVSLNCLTTALDRTDADVTIYCLDKKWKERIDAALQLKE
Caaingua virus	YP_010087634.1	No	APSYDTVRENIVRSKAECIVAPVTPDGPIGAGKALADKYPQLRKTKLPPGTALAVEGTPIIAVAVPDYRALPKDAADNLLRASYAKVAEIVSEKNIKSVSTSVLSAGLCKQGMSTKVMEKSLELLFAAMDKTEARLSIHCLDKQWEQKIKTRIAAKE
Eilat virus	YP_008901141.1	No	APSYSVIRGDITATNSHAIVVPVTPERKDGVYRACSKKWGPLPRLEWTEGATLFSPGSPATLQVCVPSLQNTDTTSTQQAYRAIAKVVVDEQIPSLSLPVLTMKKTGTADTVSESLNHLVTALDQTDANVTIYCLDKSRLIKIKEVIARKE
Middelburg virus	YP_009058892.1	No	APSYRVVRGNITDSDADVLVNQLGVNNKVCDGVCRAMVKKWPSCLPTTNGKVGDAVLTTEPRKIVHAYCPNFGTSREEVADADLAAVYRAVASLADETVRTMAIPLLSTGTFAGGKDRVLQSLNHLFTALDTTDVDVTIYCRDKSWEKKIQEAIDMRT
